# Supplementary material for: Transplastomic Biofactory for the Production of Functional Human α-Lactalbumin for Nutritional and Therapeutic Applications
Source: Research Square preprint supplement (doi:10.21203/rs.3.rs-7823080/v1), 2025-10-21
Supplement: Supplementary file 1 [file d36cba3bcac01673e44e1524.docx]

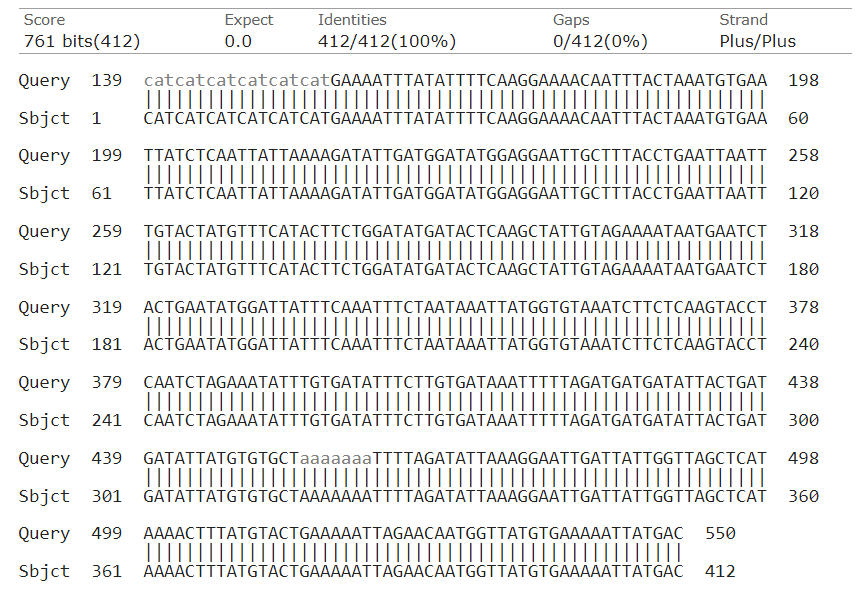


Figure S1. Figure S1. Alignment of the sequencing result (Query) of the recombinant plasmid carrying the human α-lactalbumin sequence with the synthesized human α-lactalbumin sequence (Subject) using the BLASTn tool (NCBI).


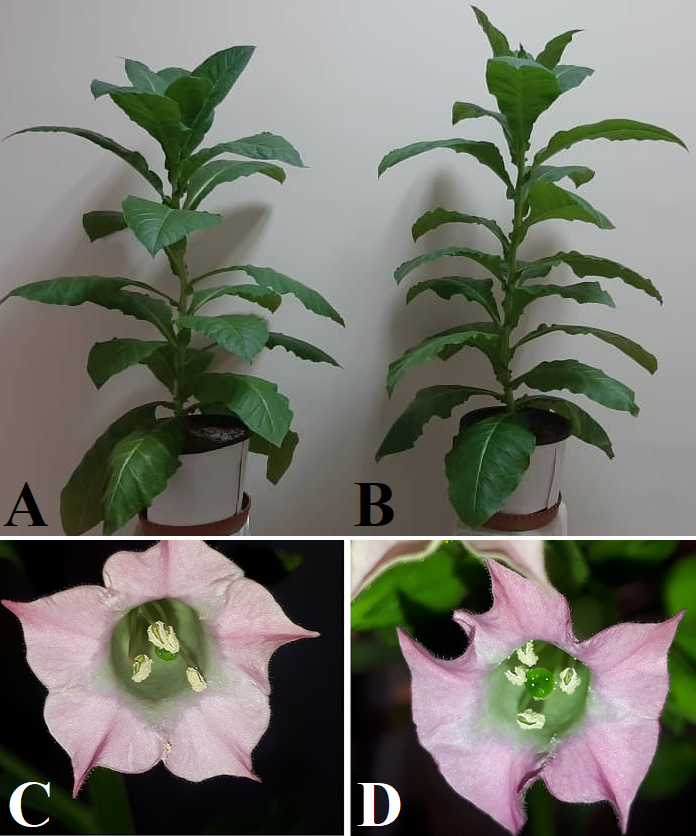


Figure S2. Panel A shows a representative transplastomic plant expressing human α-lactalbumin, while panel B depicts a wild-type control plant. Panels C and D present the corresponding flowers of the transplastomic and wild-type plants, respectively. The transplastomic lines displayed normal growth and development with no discernible differences in morphology or floral characteristics compared with wild-type controls.
